# Supplementary material for: Duodenum Intestine-Chip for preclinical drug assessment in a human relevant model
Source: eLife. 2020 Jan 14;9:e50135. doi: 10.7554/eLife.50135 (PMC6959988; doi:10.7554/eLife.50135)
Supplement: Supplementary file 1. [file elife-50135-supp1.xlsx]

## Sheet: Supplementary File 1
Supplementary File 1. RNAseq Datasets Downloaded from Public Databases
Sample Label	Description	Source	Donor ID	Accession #
Adult Duo_1	Adult Duodenum	EMBL-EBI ArrayExpress	V145	E-MTAB-1733 (duodenum_4b)
Adult Duo_2	Adult Duodenum	EMBL-EBI ArrayExpress	V150	E-MTAB-1733 (duodenum_4c)
