# Supplementary material for: Duodenum Intestine-Chip for preclinical drug assessment in a human relevant model
Source: eLife. 2020 Jan 14;9:e50135. doi: 10.7554/eLife.50135 (PMC6959988; doi:10.7554/eLife.50135)
Supplement: Supplementary file 2. [file elife-50135-supp2.xlsx]

## Sheet: Supplementary File 2
Supplementary File 2. List of human TaqMan Gene Expression Assays used for qRT-PCR.
Gene	Gene Name	TaqMan Assay ID
ALPI	Alkaline Phosphatase	Hs00357579_g1
BCRP/ ABCG2	ATP binding cassette subfamily G member 2	Hs01053790_m1
CHGA	Chromogranin A	Hs00900375_m1
CYP3A4	Cytochrome family 3 subfamily A member 4	Hs00604506_m1
EpCAM	Epithelial Cell Adhesion Molecule	Hs00901885_m1
LYZ	Lysozyme	Hs00426232_m1
MDR1/ABCB1	ATP binding cassette subfamily B member 1	Hs00184500_m1
MRP2/ ABCC2	ATP binding cassette subfamily C member 2	Hs00960489_m1
MRP3/ ABCC3	ABCC3	Hs00978452_m1
MUC2	Mucin 2	Hs00894025_m1
OAT2B1/ SLCO2B1	Solute carrier organic anion transporter family member 2B1	Hs01030343_m1
OCT1/ SLC22A1	Solute carrier family 22 member 1	Hs00427552_m1
PEPT1/SLC15A1	Solute carrier family 15 member 1	Hs00192639_m1
PXR/ NR1I2	Nuclear receptor subfamily 1 group I member 2	Hs01114267_m1
SLC40A1	Solute carrier family 40 member 1	Hs00205888_m1
VDR	Vitamin D (1,25- dihydroxyvitamin D3) receptor	Hs01045843_m1
